# Supplementary material
Source: PubMed Central journal article supplement (PMC5572929)
Supplement: 10.1074_M117.790030_jbc.M117.790030-1.pdf [file 10.1074_M117.790030_jbc.M117.790030-1.pdf]

# **The long non-coding RNA GAS5 regulates TGF- $\beta$ -induced smooth muscle cell differentiation via RNA-Smad binding element**

Rui Tang, Gui Zhang, Yung-Chun Wang, Xiaohan Mei, and Shi-You Chen

Department of Physiology and Pharmacology, University of Georgia, Athens, GA

## **Supplemental Materials**

**Supplemental Figure 1**

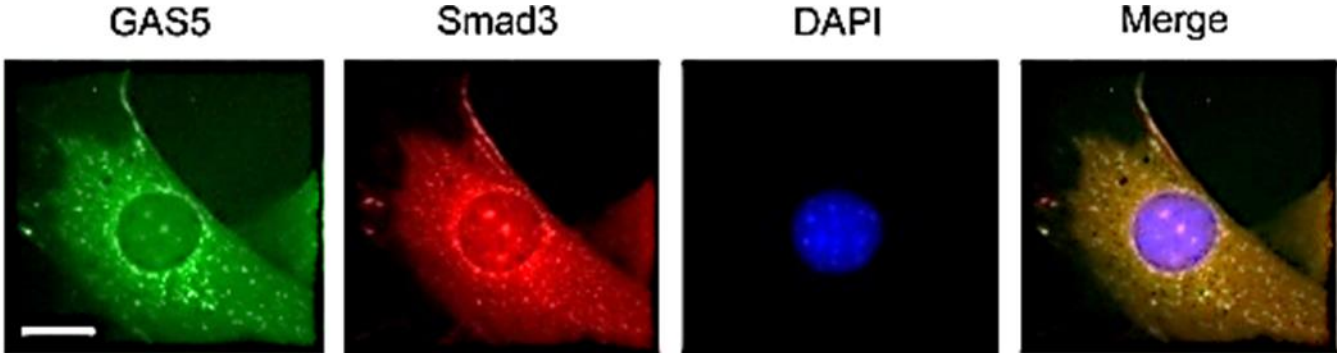

**Figure S1: GAS5 (green) co-localized with Smad3 (red) in 10T1/2 cells.** Shown are fluorescence in situ hybridization for GAS5 and immunostaining for Smad3. Bar: 20  $\mu$ m.

**Supplemental Figure 2**

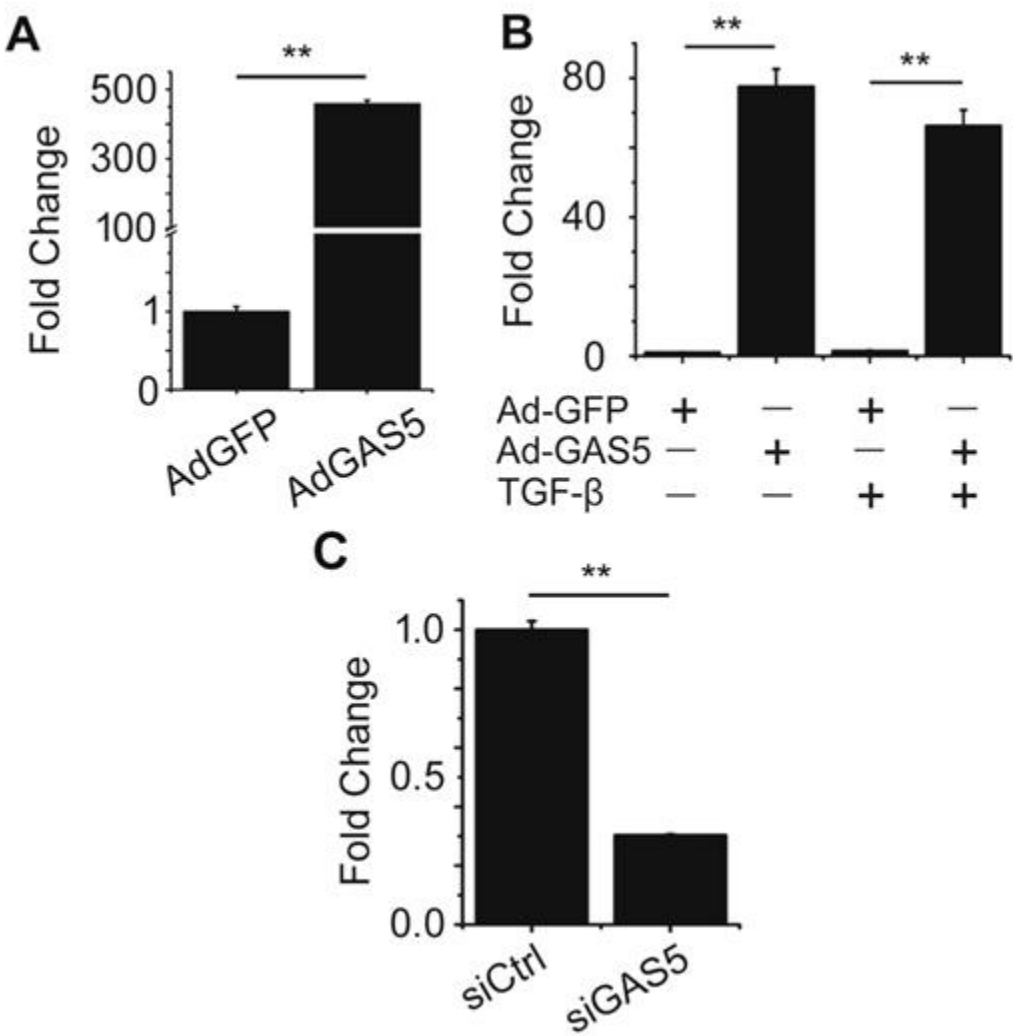

**Figure S2: Overexpression and knockdown efficiency of GAS5 gene.** **A)** GAS5 adenoviral transduction (AdGAS5) dramatically increased GAS5 expression in 10T1/2 cells. **B)** GAS5 adenoviral transduction (Ad-GAS5) increased nuclear GAS5 levels in both untreated or TGF- $\beta$ -treated 10T1/2 cells. **C)** GAS5 expression was knocked down by its siRNA (siGAS5). The data present the mean $\pm$ s.e.m. **\*\***P<0.01 (Student's t-test).

Supplemental Figure 3

A

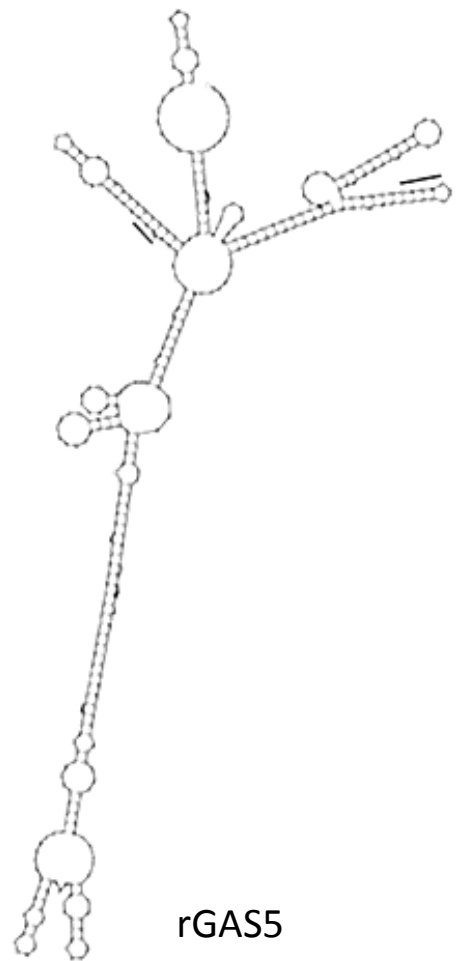

rGAS5

B

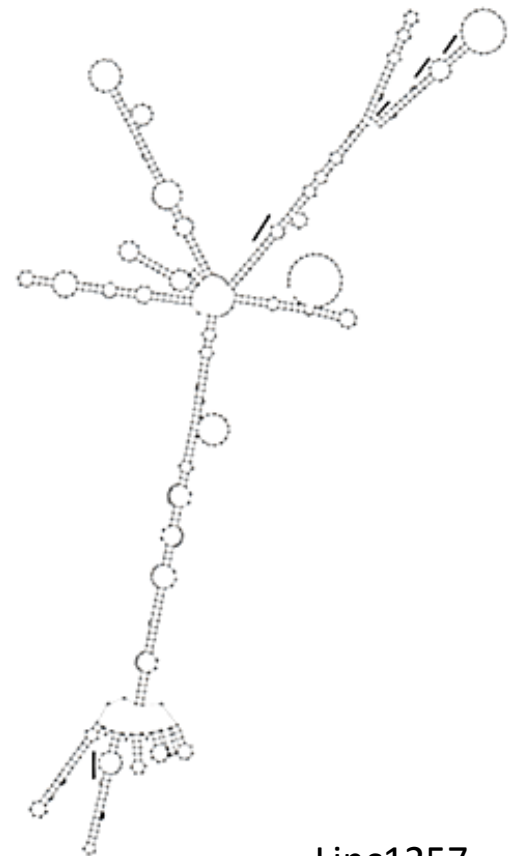

Linc1257

**Figure S3: Predicted secondary structure of lncRNAs.** A) Secondary structure of rat GAS5 (rGAS5). B) Secondary structure of Linc1257. Underlines indicate the locations of rSBE elements.

**Supplemental Table S1: Primers used for PCR analysis, in vitro transcription, and vector construction.**

|                    |                                 |
|--------------------|---------------------------------|
| mmu-U6-F           | CTC GCT TCG GCA GCA CA          |
| mmu-U6-R           | AAC GCT TCA CGA ATT TGC GT      |
| mmu-Adapt33-F      | GGA GCT CTC GAT GTG ACC TG      |
| mmu-Adapt33-R      | TCT CTC ATG AGG ACA GCG GA      |
| mmu-AK082072-F     | AGA AGA TGC CCA TGA CAG CAA     |
| mmu-AK082072-R     | GGA GCA CAG AGA TCA GCA CAT     |
| mmu-antiPeg11-F    | CTC CAC TCG AGG GTA CTC CA      |
| mmu-antiPeg11-R    | TCC AAA CCG ACG ACG AAA CT      |
| mmu-B2SINE-F       | GGC TGG TGA GAT GGC TCA GT      |
| mmu-B2SINE-R       | AAA GAT TTA TTT ATT TAT TAT ATG |
| mmu-BACE1AS-F      | ATG CCC CAT CCT CAT CCC AA      |
| mmu-BACE1AS-R      | TGC TTG GCA TAC CCA AAT GC      |
| mmu-BC1-F          | AAG GAG TTG GGG ATT TAG CTC     |
| mmu-BC1-R          | AAT AAT GAT GTA ATT TGA TTT AC  |
| mmu-BORG-F         | AAT CCC AGC AGC CGT GTA AA      |
| mmu-BORG-R         | GTC TTT GCT CAC TTC CCC CA      |
| mmu-CDR1AS-F       | CAT GTG TCT TCC TTC ACC TCC A   |
| mmu-CDR1AS-R       | CGG CAG ACA CCA GAA AAC CT      |
| mmu-Dio3os-F       | ATG GGA CAC TTG GGA AAC CC      |
| mmu-Dio3os-R       | AGG TGT GGG GTG TAG CCT AT      |
| mmu-GAS5-F         | GGA GGT TGG TTC TGC GTG TA      |
| mmu-GAS5-R         | CGC ATG CTG AGT CGT CTT TG      |
| mmu-H19-F          | GCA GGT AGA GCG AGT AGC TG      |
| mmu-H19-R          | AGA CCT GGC CTA GTC TCC AG      |
| mmu-HOTAIR-F       | GGC TGC CTG AGT TCT TTT GC      |
| mmu-HOTAIR-R       | TGC GGT GGA GAT AGA TGT GC      |
| mmu-HOTTIP-F       | TCC CGC TTT GTA CAG GGA AC      |
| mmu-HOTTIP-R       | GAG GGG CTT GCT ACA CCT TT      |
| mmu-Jpx-F          | CTC AGG TGG TTT TTG CGC TG      |
| mmu-Jpx-R          | CCT GCC AGT CAC AAG GCT AA      |
| mmu-lincMD1-F      | CTC TGG CTG GTC AAA CGG AA      |
| mmu-lincMD1-R      | CCC TGC TGT AGC TGG TTG AA      |
| mmu-linc1257-F     | AAC TGG GTG ATA CGC ACT GG      |
| mmu-linc1257-R     | CCA AAG CTC GGT CAT CCC TT      |
| mmu-linc1368-F     | TTG GCA GAG CTC AGT GGA TTT     |
| mmu-linc1368-R     | TAA AGC AGC CCA AGA TGC AGA     |
| mmu-linc1582-F     | GTG TTT CAC TGT GCA TCG CC      |
| mmu-linc1582-R     | TGC ATG CGG CTG TGG ATA AA      |
| mmu-linc1609-F     | AGC GCC CTC ATT TAA CAC CA      |
| mmu-linc1609-R     | TGT GTG GGC ACA AAG GTC AT      |
| mmu-lincRNA-Cox2-F | AGC TGC ACG CAC ATT AGA GA      |
| mmu-lincRNA-Cox2-R | GCA GAA GCA GAG AGG TGA GG      |

|                   |                               |
|-------------------|-------------------------------|
| mmu-lincRNA-p21-F | GAC CAG AAC TGG AGC CAA CA    |
| mmu-lincRNA-p21-R | GCC AAC TGG AAG CAA CTG TG    |
| mmu-LXRBSV-F      | CTG CCT ACA TCG TGG GTG AG    |
| mmu-LXRBSV-R      | AAG CGG ACC AAA AGA CAG GG    |
| mmu-MEG9-F        | ACA AAA GGG ATG ATG CCG GT    |
| mmu-MEG9-R        | CAT CCA GGA TTG GTC CCC AC    |
| mmu-megamind-F    | TGA AAG GCC CCA TTC AGA CC    |
| mmu-megamind-R    | TCG CTG ATA GAC GGA TGC AC    |
| mmu-Mistral-F     | GGC CAA TAC CTG CAA ACC AT    |
| mmu-Mistral-R     | ACC GAG AAG CAG GTG AGC TA    |
| mmu-Mrhl-F        | TGG TGT GAC CCA CAA CAT GA    |
| mmu-Mrhl-R        | GGA AGG GCC AGC TTC CTA AA    |
| mmu-MSUR1-F       | GTG GAG CGA TTT GTC TGG TT    |
| mmu-MSUR1-R       | ACG CTG AGC CAG TCA GTG TA    |
| mmu-Msx1as-F      | TAA AGA GAG TCT TGC TGG GGT G |
| mmu-Msx1as-R      | TTC TCA AGT GCC TCA CAG TGC   |
| mmu-NEAT1-F       | TTT GCC TAG GTT CCG TGC TT    |
| mmu-NEAT1-R       | TAA CCT CAG AGT GAG GGG CA    |
| mmu-Nespas-F      | TGG GGG CCA AGC TTT TTG AT    |
| mmu-Nespas-R      | ATC ATG AGC CCA AGG GAT GG    |
| mmu-NRON-F        | CTT CTG TCC AAG CCA CCC AT    |
| mmu-NRON-R        | ATG GCC CAT GAG GGA AAC TC    |
| mmu-Otx2os1-F     | GCA ACT CTG TCC GCT TGT TG    |
| mmu-Otx2os1-R     | CCC TAG ACG TCT GCA AAG CA    |
| mmu-PINC-F        | CTG CAG GAA GGA TAC CGT GG    |
| mmu-PINC-R        | GAT GGA TCA TCC GGG CAT GT    |
| mmu-Pldi-F        | GGG ATA GGA AAG ACG CGA GG    |
| mmu-Pldi-R        | TGA GTT GGC CCT GGA ATG AC    |
| mmu-RepA-F        | CGA GGG TAC ACT TGG TGC AT    |
| mmu-RepA-R        | TGG CAA CCA ACA CTT CCA CT    |
| mmu-Rmst-F        | GGC TAC GTG TGG GTA CAG TT    |
| mmu-Rmst-R        | TGC TGC TCC TGT CCT TTA GC    |
| mmu-RNCR3-F       | CTG CAG AAA TAA GCC ACC GC    |
| mmu-RNCR3-R       | CAG TCT GGC TTG TCC GGT AG    |
| mmu-Six3os-F      | GTC GCC TGG TTC TCT GAT GA    |
| mmu-Six3os-R      | CCT CAT CCC ACT ACG GAA CG    |
| mmu-SRA-F         | TGA TAT CAG CCG ACG CTT GG    |
| mmu-SRA-R         | GTC ATC TGC TGC ATC CCA CT    |
| mmu-Sry-F         | TTA GTG TTC AGC CCT ACA GCC   |
| mmu-Sry-R         | ATT CAT GGG GCG CTT GAC A     |
| mmu-Tip3-F        | TGG CCG AGC AGA TGT GAA AG    |
| mmu-Tip3-R        | AGC TCA CAG CCA GCT ACA AA    |
| mmu-VL30-F        | TAG ACG TGT CCA GGT GTC CA    |
| mmu-VL30-R        | GAT CTC GCA ACA AAA CAC GA    |

|                         |                                                                                                                              |
|-------------------------|------------------------------------------------------------------------------------------------------------------------------|
| mmu-YRNA-F              | GCT GGT CCG AAG GTA GTG AG                                                                                                   |
| mmu-YRNA-R              | CTA GTC AAG TGC AGT AGT GAG AAG G                                                                                            |
| mmu-Zfas1-F             | GGC TCG GGG ACT ACA TTT CC                                                                                                   |
| mmu-Zfas1-R             | CCG GAA CGA AAG GAC GAG AG                                                                                                   |
| mmu-SM22-F              | GGT CCA TCC TAC GGC ATG AG                                                                                                   |
| mmu-SM22-R              | CCT ACA TCA GGG CCA CAC TG                                                                                                   |
| mmu-SMA-F               | AAT GGC TCT GGG CTC TGT AAG                                                                                                  |
| mmu-SMA-R               | CAC GAT GGA TGG GAA AAC AGC                                                                                                  |
| mmu-Col1a-F             | TCC TTC TGG TCC TCG TGG TCT C                                                                                                |
| mmu-Col1a-R             | AGC CTC GGT GTC CCT TCA TTC C                                                                                                |
| mmu-CNN1-F              | AAT ACG ACC ATC AGC GGG AG                                                                                                   |
| mmu-CNN1-R              | ATG AAG TTG TTC CCG ATG CG                                                                                                   |
| mmu-GAS5-F1-pshuttle-F  | ACG CCC GGG CCT CGA GAC CAT GCT TTC GGA GCT GTG CGG CAT TCT<br>GAG C                                                         |
| mmu- GAS5-F1-pshuttle-R | CCT TGT AGT CCT CGA GAA GAA AAA TGT TAA TCT TTA GTA GTT CTA<br>CTT CC                                                        |
| mmu-GAS5-F2-pshuttle-F  | ACG CCC GGG CCT CGA GAC CAT GAG GAA TGG CAG TGT GGA CC                                                                       |
| mmu- GAS5-F2-pshuttle-R | CCT TGT AGT CCT CGA GTG TTC TAG TCA TGC CCC TC                                                                               |
| mmu-GAS5-F3-pshuttle-F  | ACG CCC GGG CCT CGA GAC CAT GTA ATG ACC ACA AAG CCC ATG ATG<br>G                                                             |
| mmu- GAS5-F3-pshuttle-R | CCT TGT AGT CCT CGA GGG GGG GGG GAA TCT TTA TGT AAA AAC<br>TGC                                                               |
| mmu-GAS5-F4-pshuttle-F  | ACG CCC GGG CCT CGA GAC CAT GCA GGA CTC GTC AGG AAG CTG                                                                      |
| mmu- GAS5-F4-pshuttle-R | CCT TGT AGT CCT CGA GTA CCT TTC AAA CTG TCT ATC C                                                                            |
| mmu-GAS5-F5-pshuttle-F  | ACG CCC GGG CCT CGA GAC CAT GAG TAT TGA AAA ACA CTT GAA TTT<br>GGG                                                           |
| mmu- GAS5-F5-pshuttle-R | CCT TGT AGT CCT CGA GTT AAT ACC TGT AAG AAA TTA CAC TCC                                                                      |
| mmu-GAS5-F6-pshuttle-F  | ACG CCC GGG CCT CGA GAC CAT GTG GGT CAC CTC AAG TGA AGG                                                                      |
| mmu- GAS5-F6-pshuttle-R | CCT TGT AGT CCT CGA GCA TGT TAT AAT ACA CTT TAA TGG                                                                          |
| mmu-GAS5-pshuttle-F     | ACG CCC GGG CCT CGA GAC CAT GCT TTC GGA GCT GTG CGG CAT TCT<br>GAG C                                                         |
| mmu-GAS5-pshuttle-R     | CCT TGT AGT CCT CGA GCA TGT TAT AAT ACA CTT TAA TGG                                                                          |
| mmu-GAS5fl-(T7)-F       | GAG TAA TAC GAC TCA CTA TAG GGC TTT CGG AGC TGT GCG GCA TTC                                                                  |
| mmu-GAS5fl-(T3)-R       | GAG ATT AAC CCT CAC TAA AGG GAC ATG TTA TAA TAC ACT TTA ATG<br>G                                                             |
| mmu-G5-FISHprobe-T7     | GAG TAA TAC GAC TCA CTA TAG GGA ACA GTG CCT ATG TGG ACG G                                                                    |
| mmu-G5-FISHprobe-T3     | GAG ATT AAC CCT CAC TAA AGG GAC TAT CGT CAC CCC AGC TGT C                                                                    |
| SBERNA-CAGAC-T7-F       | GAA ATT AAT ACG ACT CAC TAT AGG GCA GAC AGC AGA CTC AAG<br>AGG TCT GGA GTC TGA ACA GAC AGC AGA CTC AAG AGG TCT GGA<br>GTC TG |
| SBERNA-CAGAC-T7-R       | CAG ACT CCA GAC CTC TTG AGT CTG CTG TCT GTT CAG ACT CCA GAC<br>CTC TTG AGT CTG CTG TCT GCC CTA TAG TGA GTC GTA TTA ATT TC    |
| SBERNA-CAGGG-T7-F       | GAA ATT AAT ACG ACT CAC TAT AGG GCA GGG AGC AGG GTC AAG<br>AGC CCT GGA CCC TGA ACA GGG AGC AGG GTC AAG AGC CCT GGA<br>CCC TG |

|                          |                                                                                                                                                                            |
|--------------------------|----------------------------------------------------------------------------------------------------------------------------------------------------------------------------|
| SBERNA-CAGGG-T7-R        | CAG GGT CCA GGG CTC TTG ACC CTG CTC CCT GTT CAG GGT CCA<br>GGG CTC TTG ACC CTG CTC CCT GCC CTA TAG TGA GTC GTA TTA ATT<br>TC                                               |
| SBERNA-CAGAG-SBE-F       | GAA ATT AAT ACG ACT CAC TAT AGG GCA GAG AGC AGA GAG CAG<br>AGA GCA GAG TCA AGA GCT CTG GAC TCT GGA CTC TGG ACT CTG                                                         |
| SBERNA-CAGAG-SBE-R       | CAG AGT CCA GAG TCC AGA GTC CAG AGC TCT TGA CTC TGC TCT CTG<br>CTC TCT GCT CTC TGC CCT ATA GTG AGT CGT ATT AAT TTC                                                         |
| SBERNA-CAGGC-SBE-F       | GAA ATT AAT ACG ACT CAC TAT AGG GCA GGC AGC AGG CTC AAG<br>AGG CCT GGA GCC TGA ACA GGC AGC AGG CTC AAG AGG CCT GGA<br>GCC TG                                               |
| SBERNA-CAGGC-SBE-R       | CAG GCT CCA GGC CTC TTG AGC CTG CTG CCT GTT CAG GCT CCA GGC<br>CTC TTG AGC CTG CTG CCT GCC CTA TAG TGA GTC GTA TTA ATT TC                                                  |
| CAGAC-SBERNA-RT          | CTC AAC TGG TGT CGT GGA GTC GGC AAT TCA GTT GAG CAG ACT CCA<br>GAC                                                                                                         |
| CAGAC-SBERNA-R           | TGG TGT CGT GGA GTC G                                                                                                                                                      |
| CAGAC-SBERNA-F           | ACA CTC CAG CTG GGG AAA TTA ATA CGA CTC ACT ATA GGG                                                                                                                        |
| mmu-SM22-ChIP-SBE-F      | GGT GTT GAG CCA AGC AGA C                                                                                                                                                  |
| mmu-SM22-ChIP-SBE-R      | CGA GTT GCA TTA GCC CTG G                                                                                                                                                  |
| mmu-linc1257- pshuttle-F | ACG CCC GGG CCT CGA GAC CAT GAA CTT TAA GCA CAC GTG AGC<br>GTC C                                                                                                           |
| mmu-linc1257- pshuttle-F | CCT TGT AGT CCT CGA GCC AGG ACA TGT CCC AAA GCT CGG                                                                                                                        |
| GAS5-caggg-F1-F          | GAA ATT AAT ACG ACT CAC TAT AGG<br>GGAGCTTAGTTGAGGGCACAAGCTGGAACTTTAGGAGGTTGGTTCT<br>CAAGAGGTGACTGCACCTTTGTTTCTGAGGTGCCTGGATGGAGGCTC                                       |
| GAS5-caggg-F1-R          | GAGCCTCCATCCAGGCACCTCAGAAACAAAGGTGCAGTCACCTCTTG<br>AGAACCAACCTCCTAAAGTTTCCAGCTTGTGCCCTGAACTAAGCTCCC<br>CTATAGTGAGTCGTATTAATTC                                              |
| GAS5-caggg-F1-MUT-F      | GAA ATT AAT ACG ACT CAC TAT AGG GGAGCTTAGTT <u>gtcct</u><br>CACAAGCTGGAACTTTAGGAGGTTGGTTCTCAAGAGGTGACTGCAC<br>CTTTGTTTCTGAGGTGCCTGGATGGAGGCTC                              |
| GAS5-caggg-F1-MUT-R      | GAG CCT CCA TCC AGG CAC CTC AGA AAC AAA GGT GCA GTC ACC<br>TCT TGA GAA CCA ACC TCC TAA AGT TTC CAG CTT GTG <u>agg acA</u><br>ACT AAG CTC CCC TAT AGT GAG TCG TAT TAA TTT C |
